# Supplementary material for: Facile preparation of small molecules for bulk heterojunction solar cells
Source: Royal Society of Chemistry journal article supplement (doi:10.1039/c6ra09544e), 2016-01-01
Supplement: c6ra09544e1.pdf [file c6ra09544e1.pdf]

## Supplementary Information

### **Facile preparation of small molecules for bulk heterojunction solar cells**

Huadong Huang, Liangang Xiao, Binglin Yang, Tianqi Lai, Lin Zhang, Ke Gao,

Xiaobin Peng,\* Yong Cao

Institute of Polymer Optoelectronic Materials and Devices, State Key Laboratory of

Luminescent Materials and Devices, South China University of Technology, 381

Wushan Road, Guangzhou 510640, China. Email: [chxbpeng@scut.edu.cn](mailto:chxbpeng@scut.edu.cn)

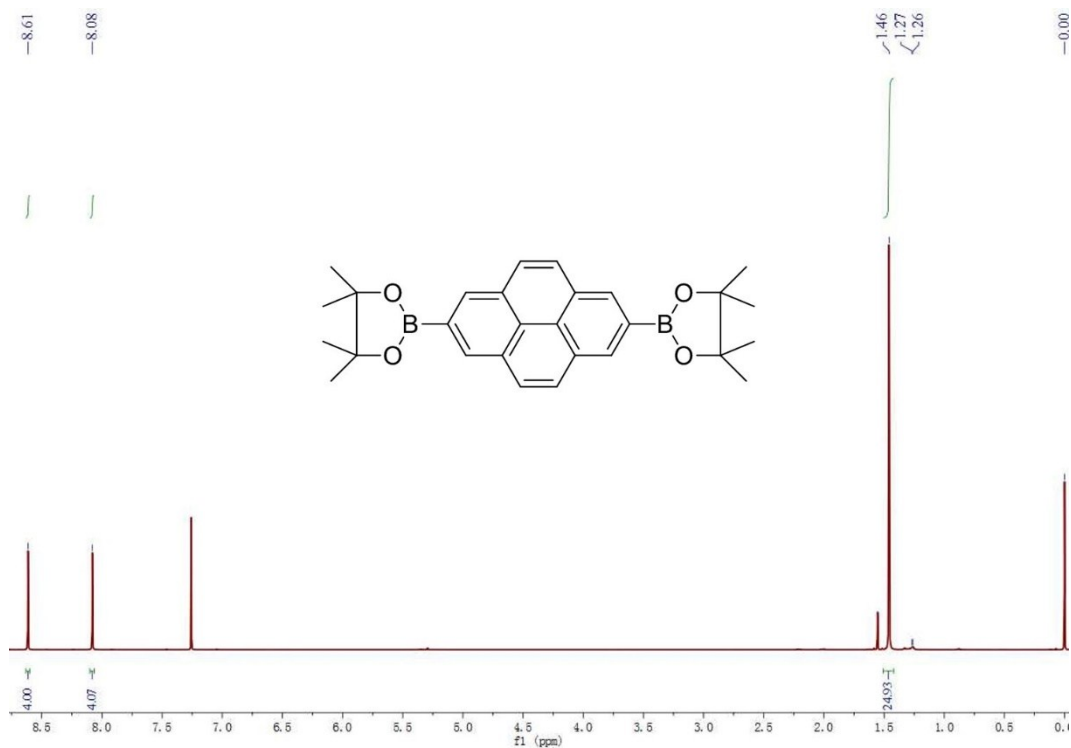

**Fig. S1.** <sup>1</sup>H NMR spectrum (500MHz, CDCl<sub>3</sub>) of **1**.

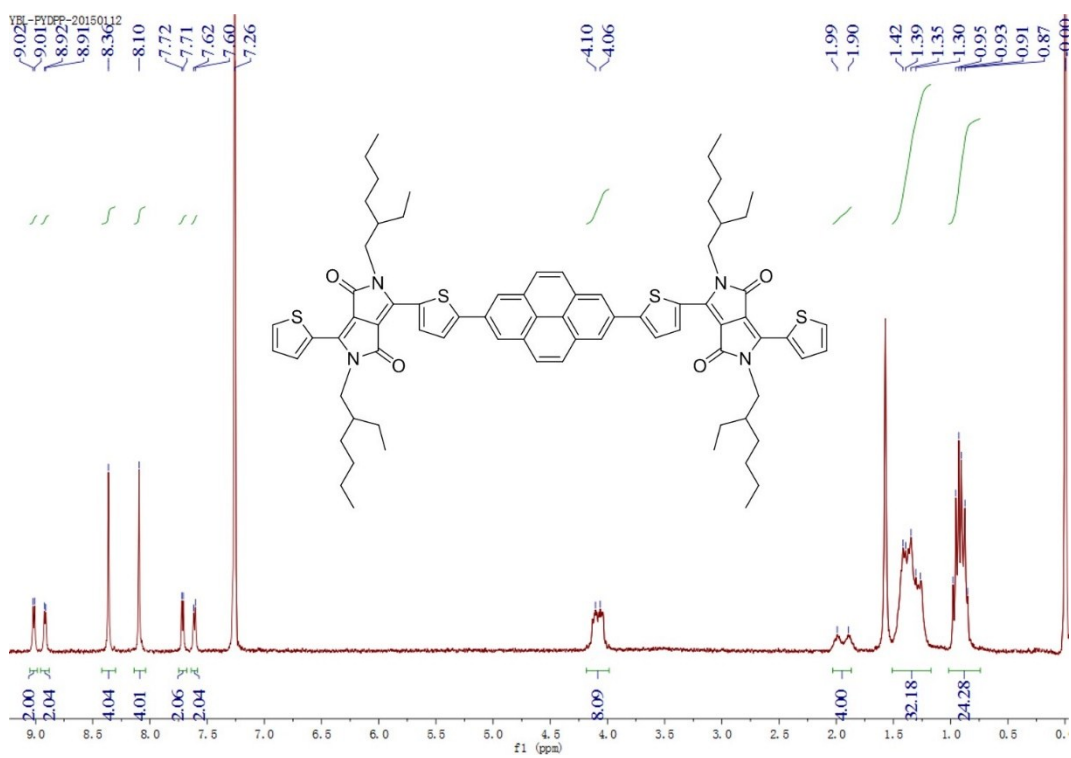

**Fig. S2.** <sup>1</sup>H NMR spectrum (500MHz, CDCl<sub>3</sub>) of **3a**.

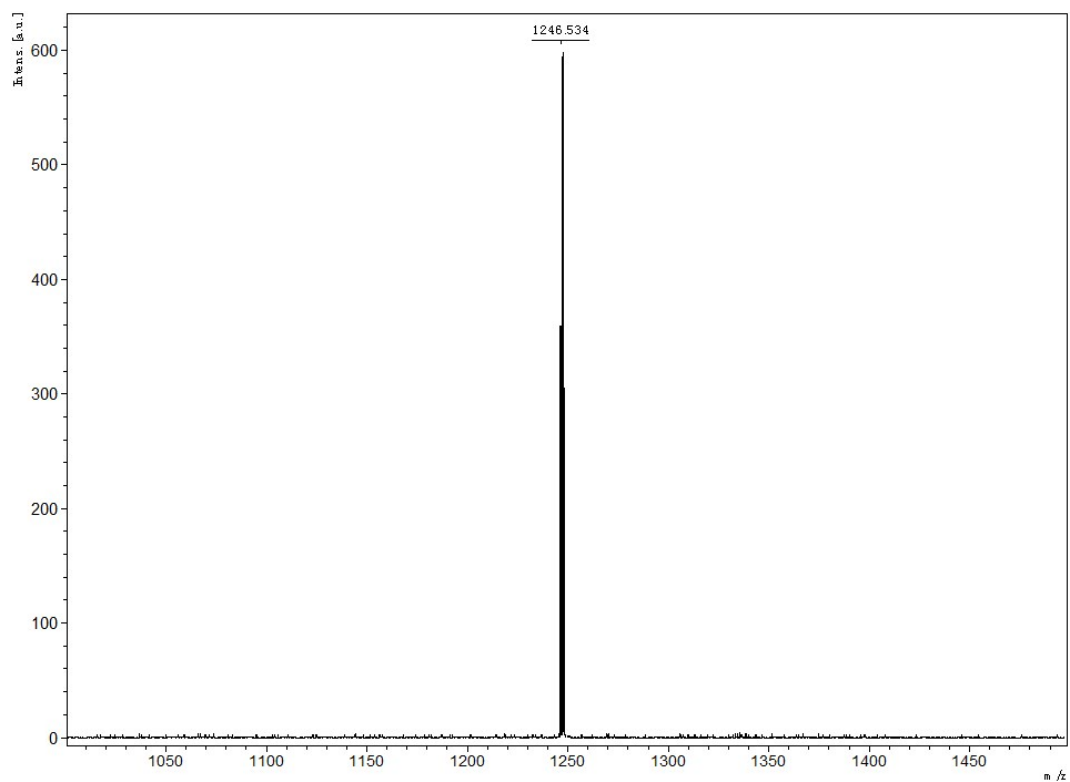

**Fig. S3.** Mass (MALDI-TOF) spectrum of **3a**.

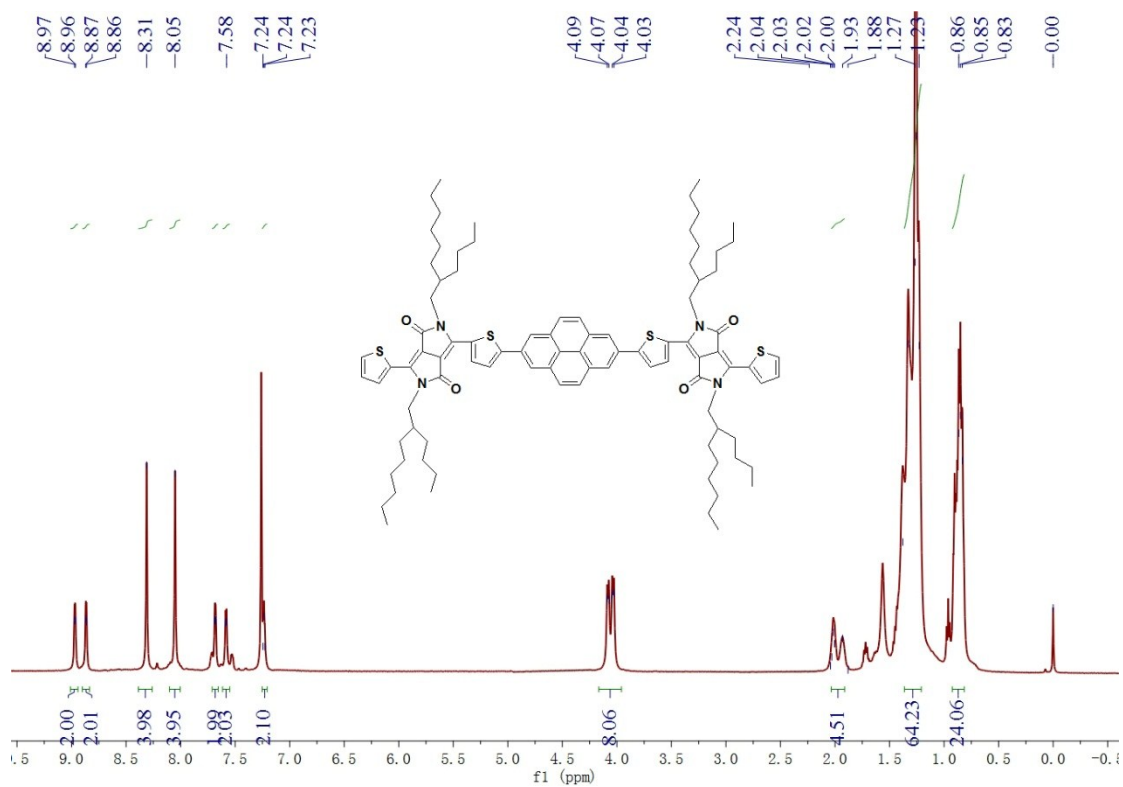

**Fig. S4.**  $^1\text{H}$  NMR spectrum (500MHz,  $\text{CDCl}_3$ ) of **3b**.

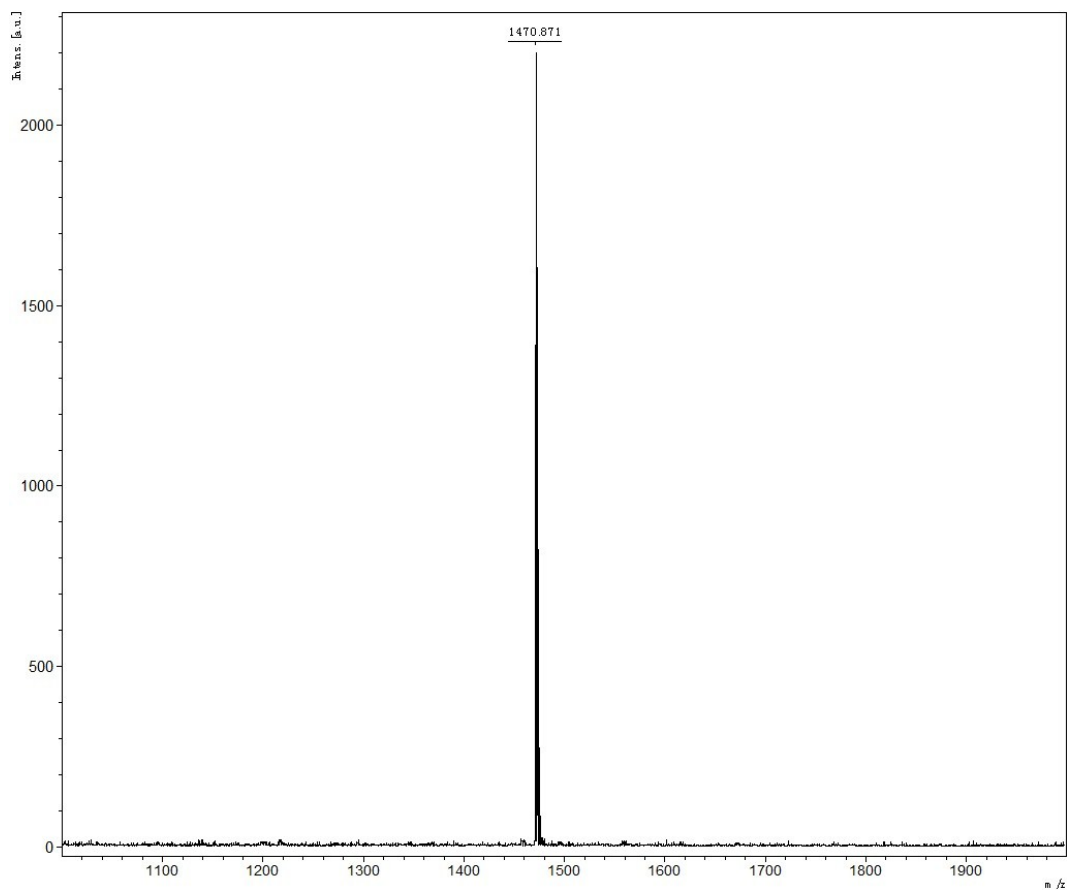

**Fig. S5.** Mass (MALDI-TOF) spectrum of **3b**.

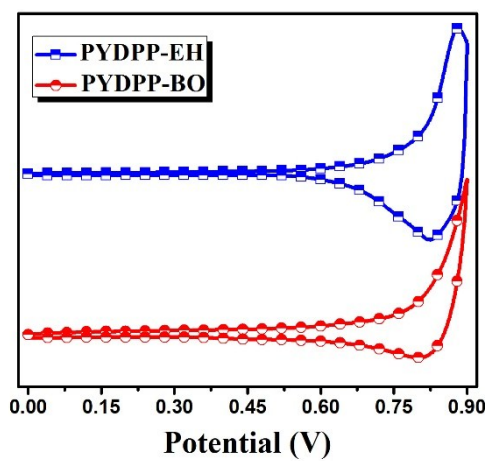

**Fig. S6.** Cyclic voltage curves of **3a** and **3b**.

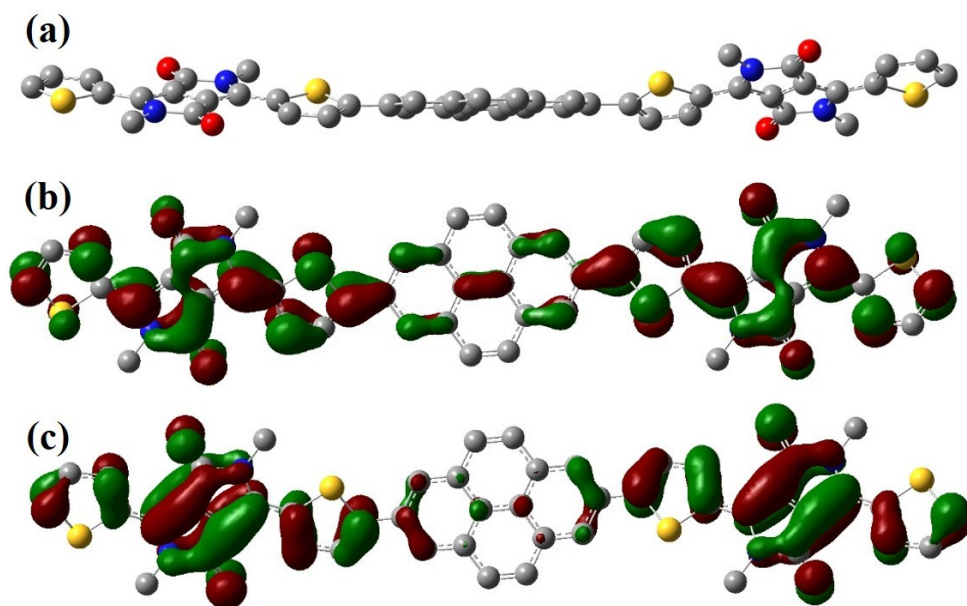

**Fig. S7.** The optimum geometry and electron-state-density distribution of PYDPP regardless of the *N*-alkyl substitutes: (a) geometry, (b) LUMO and (c) HOMO.

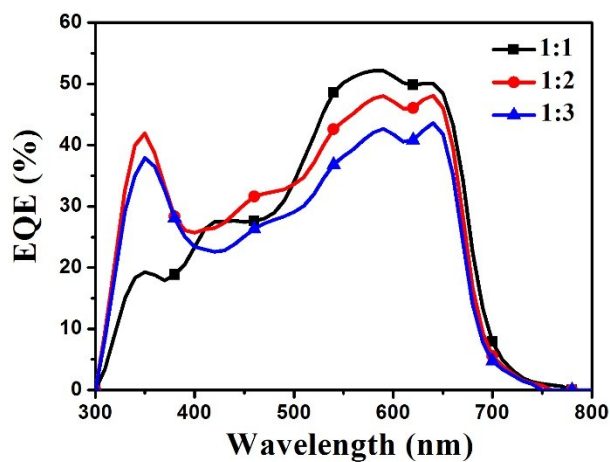

Figure S8. EQE response of PYDPP-EH based BHJ solar cells with different D/A ratio.

**Table S1.** Photovoltaic properties of BHJ solar cell devices having the configuration of ITO/PEDOT:PSS/PYDPP-EH:PC<sub>61</sub>BM/PFN/Al.

| Processing  | D:A | $J_{SC}/\text{mA cm}^{-2}$ | $V_{OC}/\text{V}$ | FF/%  | PCE/%       |
|-------------|-----|----------------------------|-------------------|-------|-------------|
| CF+0.4 vol% | 1:1 | 9.66                       | 0.87              | 55.17 | 4.64 ± 0.15 |
|             | 1:2 | 8.49                       | 0.87              | 57.94 | 4.28 ± 0.08 |
| DIO         | 1:3 | 7.69                       | 0.86              | 59.41 | 3.93 ± 0.11 |

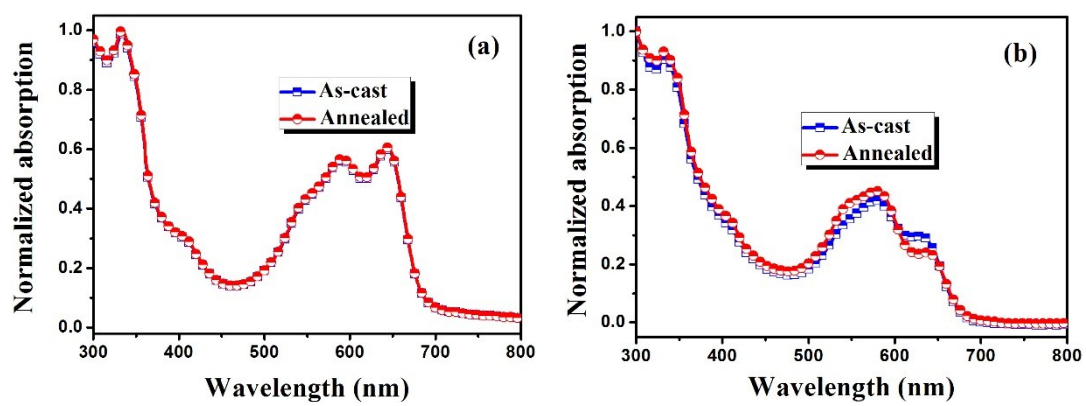

**Figure S9.** UV-vis absorption spectra of the as-cast and annealed blend films of (a) PYDPP-EH:PC<sub>61</sub>BM and (b) PYDPP-BO:PC<sub>61</sub>BM (1:1 w/w).
